# Supplementary material for: Birds repurpose the role of drag and lift to take off and land
Source: PubMed Central journal article supplement (PMC6877630; doi:10.1038/s41467-019-13347-3), 2019-11-25
Supplement: 41467_2019_13347_MOESM1_ESM.pdf [file 41467_2019_13347_MOESM1_ESM.pdf]

Supplementary Information

**Birds repurpose the role of drag and lift to take off and land**

Diana D. Chin and David Lentink

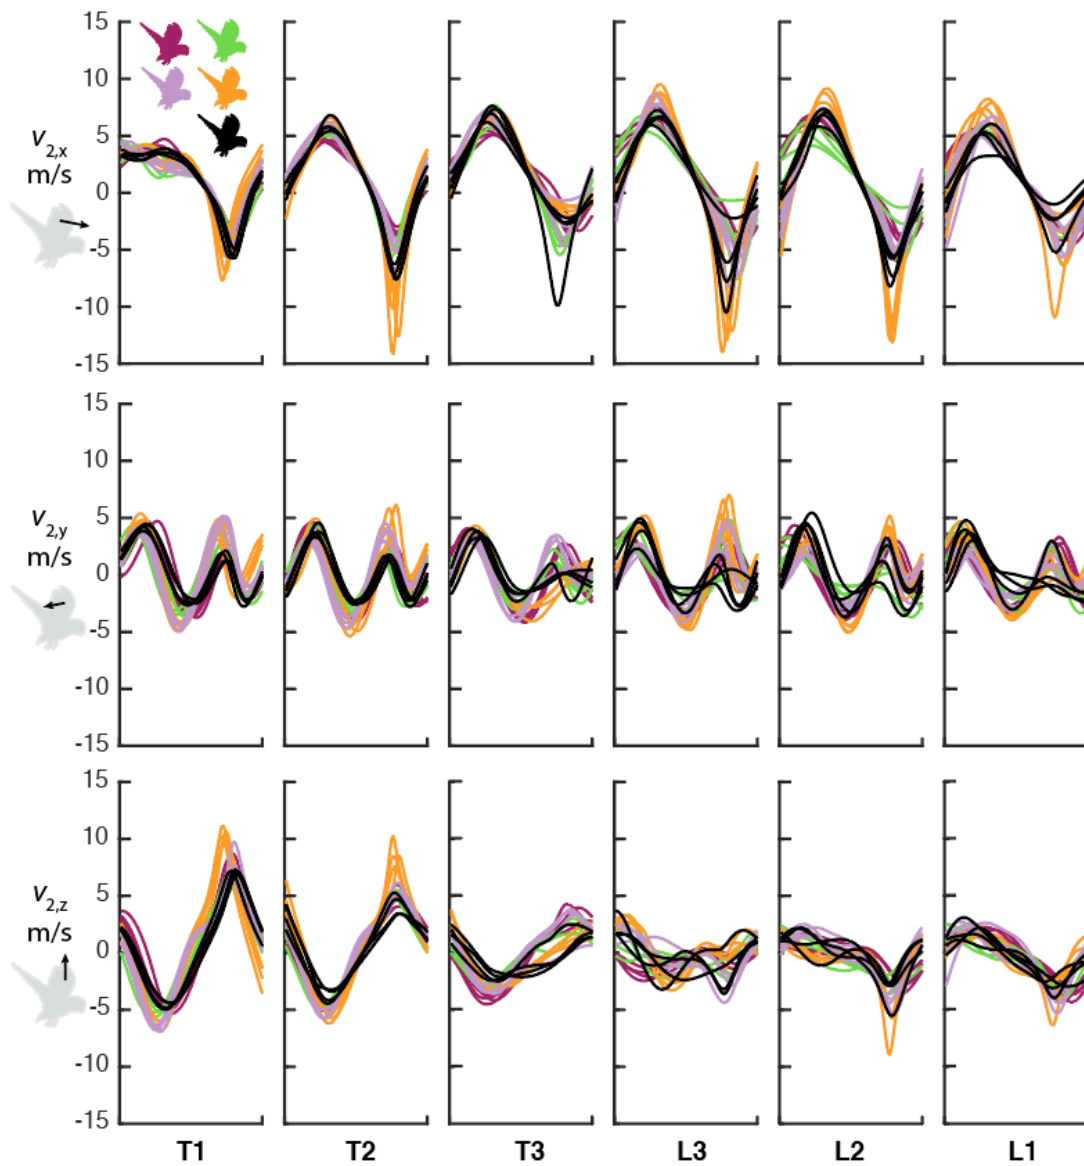

**Supplementary Figure 1. Wing velocity components at the second moment of area  $r_2$ .** Time traces of the  $x$ ,  $y$ , and  $z$  wing velocity components at  $r_2$  during the first three takeoff wingbeats (T1, T2, T3) and the final three full landing wingbeats (L3, L2, L1) are shown for all recorded flights. Colors represent the 5 individual parrotlets (colored traces correspond to the 4 pale blue parrotlets, and the black trace corresponds to the darker blue parrotlet).

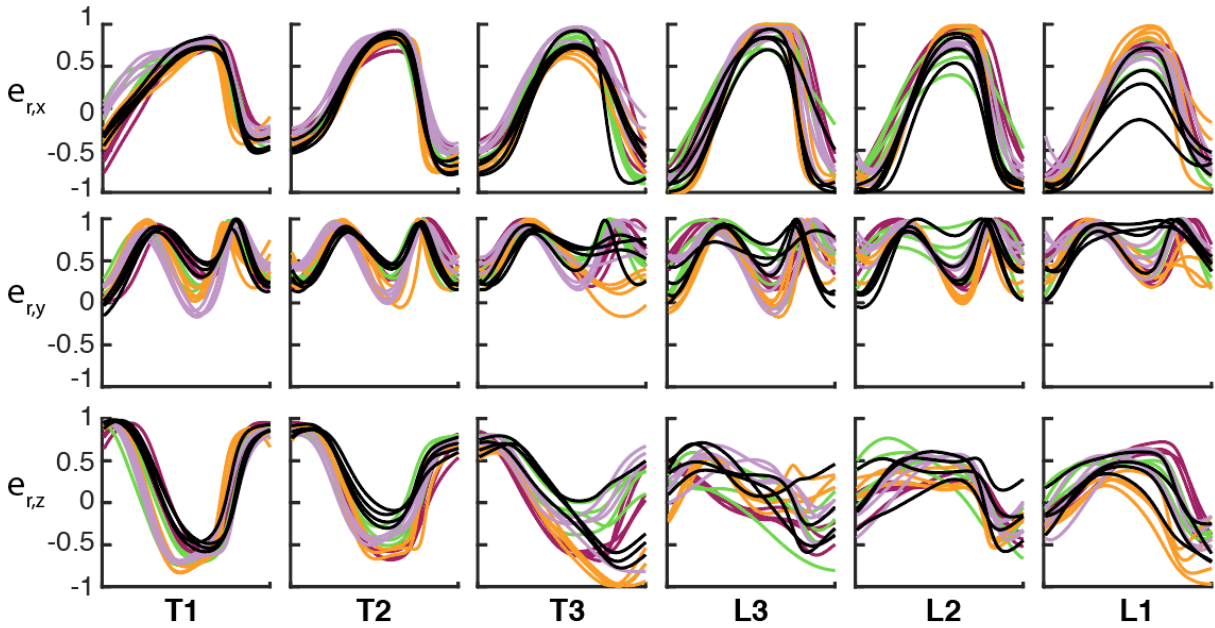

**Supplementary Figure 2. Wing radius direction components during takeoff and landing wingbeats.** Time traces of the parrotlets' wing radius direction ( $\hat{\mathbf{r}} = \langle e_{r,x}, e_{r,y}, e_{r,z} \rangle$ ) during takeoff (T1, T2, T3) and landing (L3, L2, L1) are shown for all recorded flights. Colors represent the 5 individual parrotlets (colored traces correspond to the 4 pale blue parrotlets, and the black trace corresponds to the darker blue parrotlet).
